# Supplementary figures and images for: Genome-wide Identification of the SWEET Gene Family in Elymus dahuricus and Functional Characterization of EdSWEET15 in Salt Tolerance
Source: Research Square preprint supplement (doi:10.21203/rs.3.rs-8489404/v1), 2026-01-27

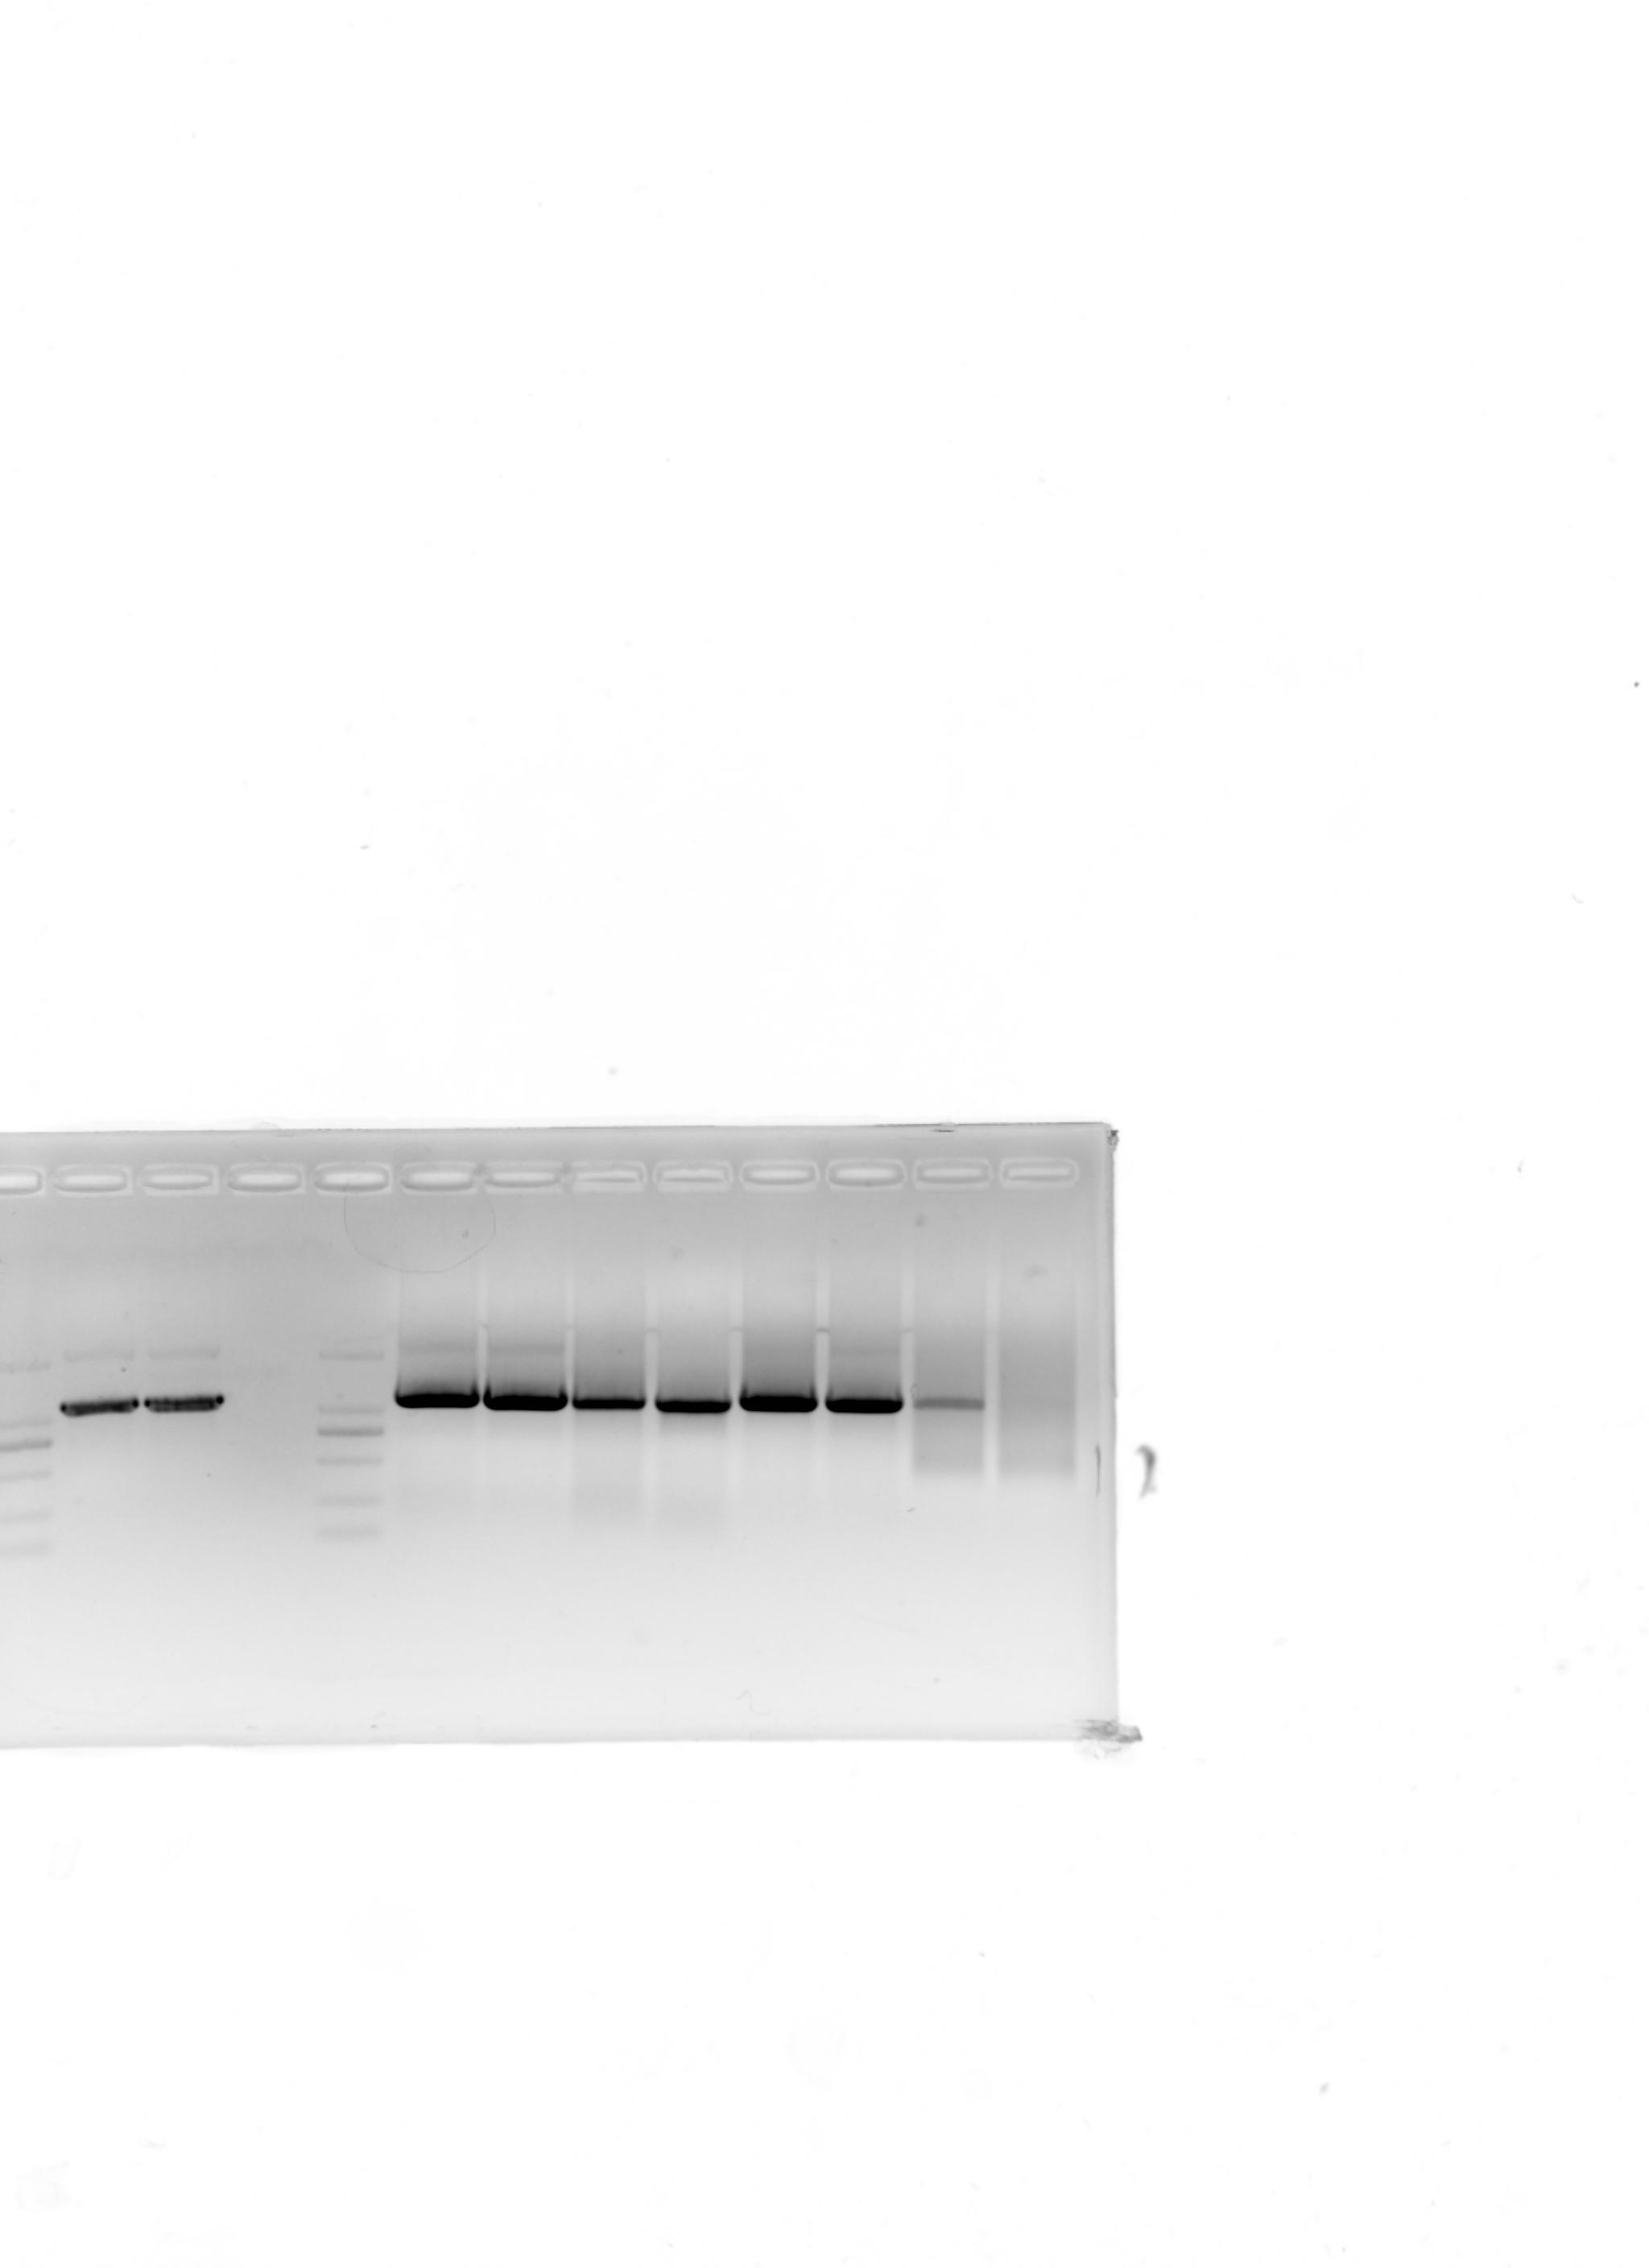


Fig. 1 the full uncropped Gels and Blots image

Supplement: Supplementary file 3 [file a61b1d518dfd68578ba27166.docx]
